# Supplementary material for: Keap1 hypomorphism protects against ischemic and obstructive kidney disease
Source: PubMed Central journal article supplement (PMC5090361; doi:10.1038/srep36185), 2016-11-02
Supplement: srep36185-s1.pdf [file srep36185-s1.pdf]

Manuscript:

**Keap1 hypomorphism protects against ischemia and obstructive kidney disease**

Roderick J. Tan, Dionysios V. Chartoumpekis, Brittney M. Rush, Dong Zhou, Haiyan Fu, Thomas W. Kensler, and Youhua Liu

**Supplemental Figure Legends**

**Supplemental Figure 1. Keap 1 hypomorph mice are similar to wild type mice at baseline. (a, b)**

Untreated wild type (WT) and Keap1 hypomorph (KEAP1) mice were analyzed for serum creatinine and BUN. (c-e) Assessment of inflammatory cytokine expression in the kidney in untreated mice. These results show that WT and KEAP1 mice have no significant baseline differences prior to injury.

**Supplemental Figure 2. Keap1 hypomorphs (KEAP1) have upregulated catalase at baseline, 1 and 3 days.**

mRNA for catalase (a-c), and the three superoxide dismutases (SOD1, 2, and 3) (d-l) were assessed in kidneys in uninjured kidneys (control, CTL) and at 1 and 3 days after IRI. Only catalase was significantly increased in the KEAP1 mice compared to wild type mice at baseline, 1, or 3 days after IRI.

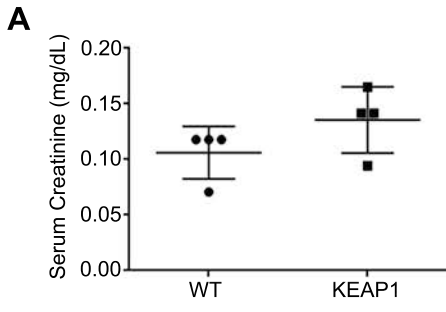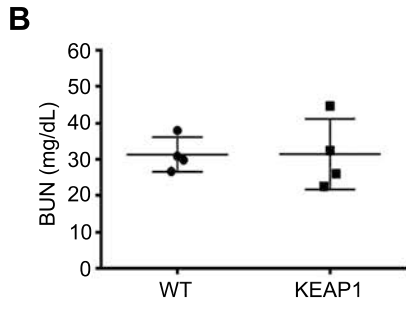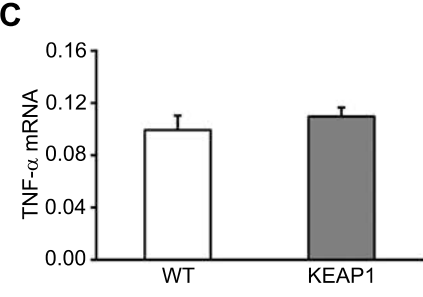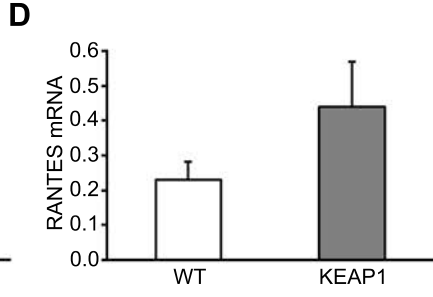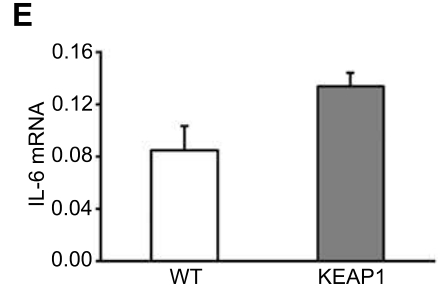

Supplemental Figure S1

CONTROL

1 DAY

3 DAY

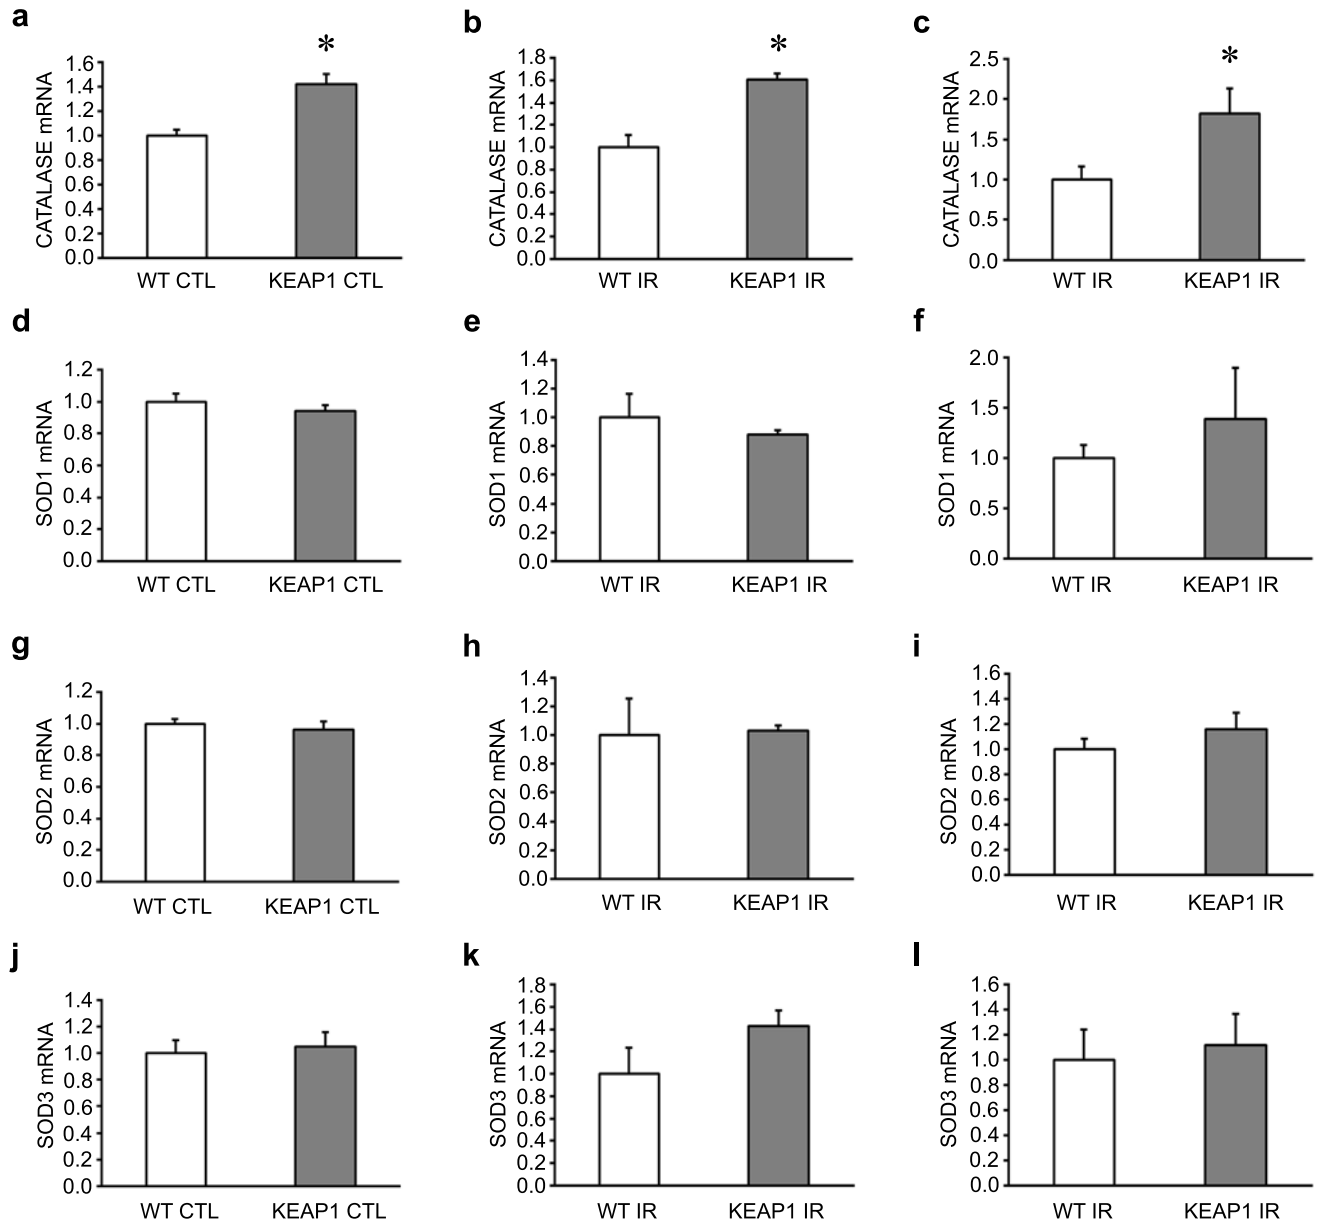

Supplemental Figure S2
